# Supplementary material for: Pain Reduction in Adults with Limb Spasticity Following Treatment with IncobotulinumtoxinA: A Pooled Analysis
Source: Toxins (Basel). 2021 Dec 11;13(12):887. doi: 10.3390/toxins13120887 (PMC8704318; doi:10.3390/toxins13120887)
Supplement: Supplementary file 1 [file toxins-13-00887-s001.zip › toxins-1463098-SU-12.9-12.20.pdf]

# Supplementary Materials: Pain Reduction in Adults with Limb Spasticity following Treatment with IncobotulinumtoxinA: A Pooled Analysis

Jörg Wissel, Alexandre Camões-Barbosa, Georg Comes, Michael Althaus Astrid Scheschonka and David M. Simpson

**Table S1.** Patients with pain at baseline who contributed data for the pooled analyses, by study.

| Study and primary reference                               | IncobotulinumtoxinA<br>(N = 415) | Placebo<br>(N = 129) | Total<br>(N = 544) |
|-----------------------------------------------------------|----------------------------------|----------------------|--------------------|
| MRZ_60201_0307                                            | 8                                | 6                    | 14                 |
| MRZ_60201_0410<br>NCT00432666 (Kanovsky et al. 2009) [12] | 35                               | 35                   | 70                 |
| MRZ_60201_0607<br>NCT00465738 (Barnes et al. 2010) [27]   | 94                               | –                    | 94                 |
| MRZ_60201_SP3001<br>NCT01392300 (Elovic et al. 2016) [14] | 144                              | 71                   | 215                |
| MRZ_60201_3053<br>NCT01603459 (Wissel et al. 2017) [15]   | 102                              | –                    | 102                |
| MRZ_60201_3099<br>CTI-153029 (Masakado et al. 2020) [34]  | 32                               | 17                   | 49                 |

**Table S2.** Use of concomitant pain-relieving medication throughout the study in patients with pain at baseline.

| ATC drug class level 2                                | IncobotulinumtoxinA<br>(N = 415) | Placebo<br>(N = 129) | Total<br>(N = 544) |
|-------------------------------------------------------|----------------------------------|----------------------|--------------------|
| Patients taking concomitant pain-relieving medication | 81 (19.5)                        | 16 (12.4)            | 97 (17.8)          |
| Analgesics                                            | 54 (13.0)                        | 11 (8.5)             | 65 (11.9)          |
| Anti-inflammatory/<br>antirheumatic drugs             | 19 (4.6)                         | 5 (3.9)              | 24 (4.4)           |
| Psychoanaleptics                                      | 6 (1.4)                          | 0                    | 6 (1.1)            |
| Topical products for<br>joint and muscular pain       | 5 (1.2)                          | 2 (1.6)              | 7 (1.3)            |
| Anaesthetics                                          | 2 (0.5)                          | 0                    | 2 (0.4)            |
| Muscle relaxants                                      | 0                                | 2 (1.6)              | 2 (0.4)            |
| Antiepileptics                                        | 1 (0.2)                          | 0                    | 1 (0.2)            |

Results are presented as *n* (%).

Differences between the two treatment groups were not statistically significant (Fisher's exact test  $p > 0.05$ ).

ATC, Anatomical, Therapeutic, Chemical.

**Table S3.** Response rates ( $\geq 1$ -point improvement in DAS pain score) at week 4 by treatment in the sensitivity analysis of patients not taking concomitant pain-relieving medication during the study.

| Responder | Treatment group                  |                      |                    | Difference           |                                  |
|-----------|----------------------------------|----------------------|--------------------|----------------------|----------------------------------|
|           | IncobotulinumtoxinA<br>(N = 324) | Placebo (N =<br>113) | Total (N =4<br>37) | Response rate<br>(%) | p-value<br>(95% CI) <sup>a</sup> |
| Yes       | 175 (54.0)                       | 32 (28.3)            | 207 (47.4)         | 25.7                 | <0.0001 (15.8,<br>35.6)          |
| No        | 149 (46.0)                       | 81 (71.7)            | 230 (52.6)         |                      |                                  |

Data are presented as *n* (%).

<sup>a</sup>p-value from a Chi Square test.

CI, confidence interval; DAS, Disability Assessment Scale for pain.
